# Supplementary material for: Nitrogen and phosphorus co-doped ultrathin carbon nanosheets as superior cathode catalysts for Zn–air batteries
Source: Royal Society of Chemistry journal article supplement (doi:10.1039/d1se00275a), 2021-01-01
Supplement: d1se00275a1.pdf [file d1se00275a1.pdf]

## Supplementary information

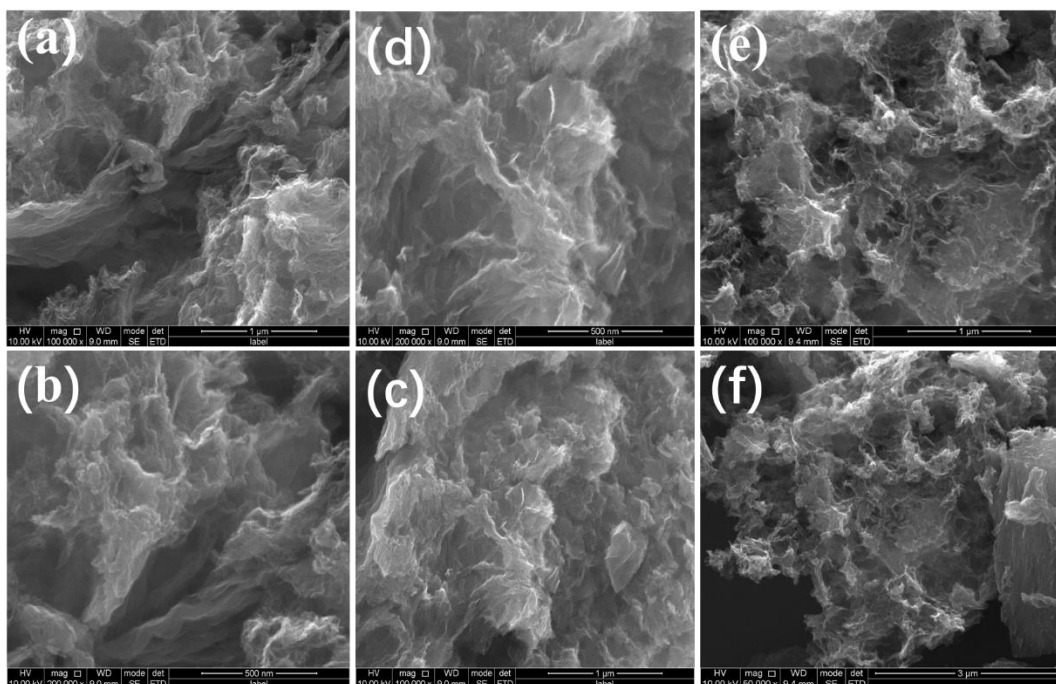

Fig.S1 SEM images of CNP<sub>50</sub>-ns(a, b), CNP<sub>200</sub>-ns(c, d), CNP<sub>300</sub>-ns(e, f)

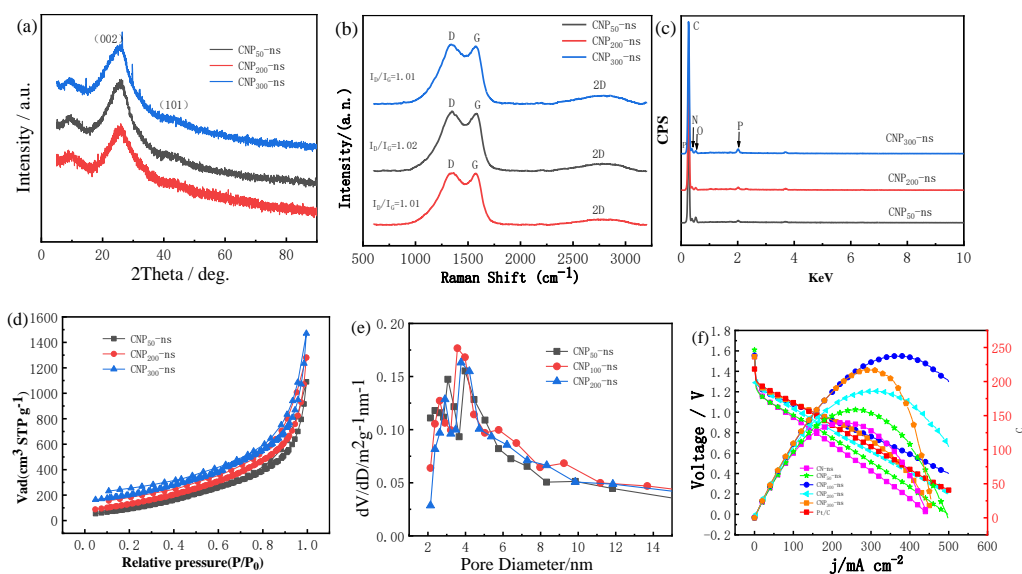

Fig.S2 XRD patterns(a); Raman spectra (b); EDS spectra(c); nitrogen adsorption-desorption isotherms(d) and corresponding pore size distributions(e) of CNP<sub>50</sub>-ns, CNP<sub>200</sub>-ns, CNP<sub>300</sub>-ns; Polarization and power density curves of the Zn-air battery with the cathodic catalysts of the CNP<sub>50</sub>-ns, CNP<sub>200</sub>-ns and CNP<sub>300</sub>-ns in 6 mol·L<sup>-1</sup> KOH(f)

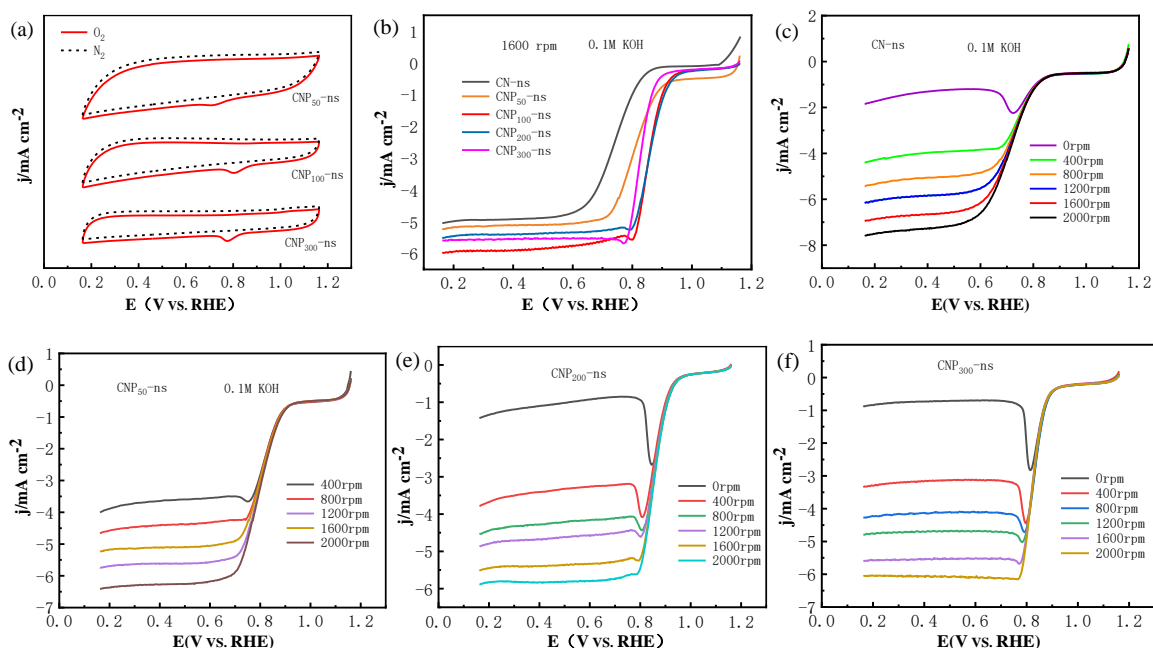

Fig.S3 CV curves of CNP<sub>50</sub>-ns, CNP<sub>200</sub>-ns, CNP<sub>300</sub>-ns in O<sub>2</sub>-saturated and N<sub>2</sub>-saturated 0.1 mol L<sup>-1</sup> KOH at a scan rate of 50 mV s<sup>-1</sup>(a). Linear polarization curves of CNP-ns catalysts and CN-ns on RDE in O<sub>2</sub>-saturated 0.1 mol·L<sup>-1</sup> KOH at 1600rpm at 5 mV·s<sup>-1</sup>(b); Linear polarization curves at 0rpm-2000rpm of CN-ns(c), CNP<sub>50</sub>-ns(d), CNP<sub>200</sub>-ns(e) and CNP<sub>300</sub>-ns(f).

**Table S1 BET characterization of all catalyst's samples**

| sample                      | Specific surface area / (m <sup>2</sup> ·g <sup>-1</sup> ) | Average pore diameter / nm | Pore volume / (cm <sup>3</sup> ·g <sup>-1</sup> ) |
|-----------------------------|------------------------------------------------------------|----------------------------|---------------------------------------------------|
| CN-ns                       | 276.65                                                     | 9.43                       | 0.65                                              |
| CNP <sub>50</sub> -ns       | 396.15                                                     | 16.83                      | 2.19                                              |
| CNP <sub>100</sub> -ns      | 451.23                                                     | 15.49                      | 1.75                                              |
| CNP <sub>200</sub> -ns      | 519.87                                                     | 16.83                      | 2.19                                              |
| CNP <sub>300</sub> -ns      | 426.50                                                     | 17.66                      | 1.89                                              |
| CNP <sub>100</sub> -ns-NaCl | 1195.29                                                    | 11.47                      | 3.43                                              |

**Table S2 Element content of CNP-ns catalysts**

| Sample                 | Atomic fraction / % |       |      |      |
|------------------------|---------------------|-------|------|------|
|                        | C                   | N     | O    | P    |
| CNP <sub>50</sub> -ns  | 79.63               | 13.01 | 7.08 | 0.28 |
| CNP <sub>100</sub> -ns | 82.95               | 15.64 | 1.50 | 0.31 |

|                        |       |       |      |      |
|------------------------|-------|-------|------|------|
| CNP <sub>200</sub> -ns | 84.7  | 12.96 | 1.95 | 0.37 |
| CNP <sub>300</sub> -ns | 84.85 | 13.57 | 1.05 | 0.53 |

**Table S3 ORR performance comparison**

| sample                              | ORR                       |                         |                                                          |                                              | Reference                                               |
|-------------------------------------|---------------------------|-------------------------|----------------------------------------------------------|----------------------------------------------|---------------------------------------------------------|
|                                     | E <sub>onset</sub><br>(V) | E <sub>1/2</sub><br>(V) | Limiting<br>current<br>Density<br>(mA cm <sup>-2</sup> ) | Tafel<br>slope<br>(mv<br>dec <sup>-1</sup> ) |                                                         |
| CNP-nanosheet-<br>NaCl              | 1.00                      | 0.92                    | 7.45                                                     | 66                                           | This work                                               |
| NPC-covalent<br>organic polymer-900 | 0.95                      | 0.84                    | 5.59                                                     | 66                                           | Chemical Engineering Journal,<br>2018, [57]             |
| NPC-nanospheres                     | 0.98                      | 0.85                    | 5.21                                                     | 74                                           | Carbon, 2020, [61]                                      |
| NPC-porous<br>networks              | 0.89                      | 0.82                    | 4.56                                                     | 59                                           | Electrochimica Acta, 2017, [62]                         |
| NPC- carbon spheres                 | 0.90                      | 0.79                    | 5.31                                                     | 118                                          | Nano Energy, 2019, [63]                                 |
| NPC-nanosheet-<br>ZnCl <sub>2</sub> | 0.90                      | 0.84                    | 5.00                                                     | 30                                           | International Journal of Hydrogen<br>Energy, 2018, [64] |
| NPC-nanoporous<br>carbon            | 0.90                      | 0.85                    | 5.51                                                     | -                                            | Carbon, 2017, [65]                                      |
| NPC-graphene<br>framework           | 0.91                      | 0.84                    | 5.62                                                     | -                                            | Energy & Environmental Science,<br>2017, [66]           |
